# Supplementary material for: Acute myeloid leukemia risk stratification in younger and older patients through transcriptomic machine learning models
Source: bioRxiv or medRxiv preprint supplement (doi:10.1101/2024.11.13.24317248), 2025-08-13
Supplement: Supplementary file [file media-1.pdf]

## Supplementary Material

### Acute myeloid leukemia risk stratification in younger and older patients through transcriptomic machine learning models

Raïssa Silva, Cédric Riedel, Maïlis Amico, Jerome Reboul, Benoit Guibert, Camelia Sennaoui, Florence Ruffle, Nicolas Gilbert, Anthony Boureux, Thérèse Commes

#### Additional information 1

The pipeline to generate ML models and predict RNA-seq data can be seen in Figure A11. From an RNA-seq cohort, we generate a training k-mer count table using Kmtricks. Then, we apply a feature selection step to select k-mers relevant to distinguish the prognosis and we generate a new training k-mer count table with the selected k-mers. This new table is used to train the ML models. For a new patient, we extract the count of the selected k-mers from the RNA-seq data using “Back To Sequences” and we generate a test k-mer count table. This table is used by the trained model to predict the prognosis.

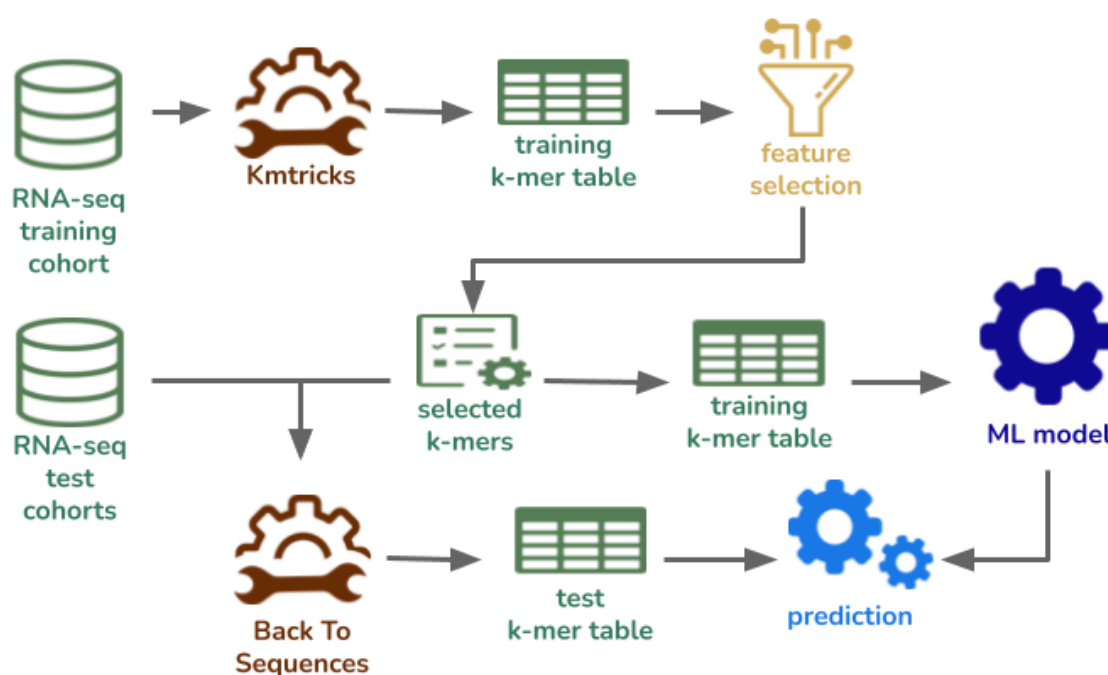

Figure A11. Pipeline to training and prediction for RNA-seq data.

## Additional information 2

As an initial test, we analyzed the prediction if the patient has a favorable or adverse risk in younger and older patients using a k-mer approach with ML, we performed initial tests with 70% of the Beat-AML cohort to train and 30% to validate. The metrics to evaluate the initial models can be seen in Table AI2.

Table AI2. Predicting favorable and adverse risk with initial models. Performance of models in younger and older patients.

| Younger - Beat-AML2.0 and Leucegene |          |      |             |             |      |
|-------------------------------------|----------|------|-------------|-------------|------|
| Model                               | Accuracy | AUC  | Sensitivity | Specificity | MCC  |
| DT                                  | 0.63     | 0.53 | 0.81        | 0.25        | 0.07 |
| KNN                                 | 0.84     | 0.75 | 1           | 0.5         | 0.64 |
| LR                                  | 0.87     | 0.84 | 0.92        | 0.75        | 0.69 |
| NN                                  | 0.89     | 0.86 | 0.96        | 0.75        | 0.75 |
| RF                                  | 0.84     | 0.75 | 1           | 0.5         | 0.64 |
| XGB                                 | 0.79     | 0.78 | 0.81        | 0.75        | 0.54 |
| Older - Beat-AML2.0 and Leucegene   |          |      |             |             |      |
| Model                               | Accuracy | AUC  | Sensitivity | Specificity | MCC  |
| DT                                  | 0.79     | 0.77 | 0.69        | 0.86        | 0.56 |
| KNN                                 | 0.82     | 0.83 | 0.85        | 0.81        | 0.64 |
| LR                                  | 0.88     | 0.89 | 0.92        | 0.86        | 0.76 |
| NN                                  | 0.85     | 0.88 | 1           | 0.76        | 0.74 |
| RF                                  | 0.85     | 0.87 | 0.92        | 0.81        | 0.71 |
| XGB                                 | 0.94     | 0.95 | 1           | 0.9         | 0.89 |

The best performance in younger patients was achieved by the Neural Network (NN) model achieving an accuracy of 89%. In older patients, eXtreme Gradient Boosting (XGB) achieved the best performance in all the metrics, with an accuracy of 94%.

### Additional information 3

We searched for the difference in peripheral blood samples, Natural killer (NK) cells, Fibroblasts, and Endothelial cells showed a difference between favorable and adverse in younger patients. In older, only Endothelial cells showed to be different between the risks.

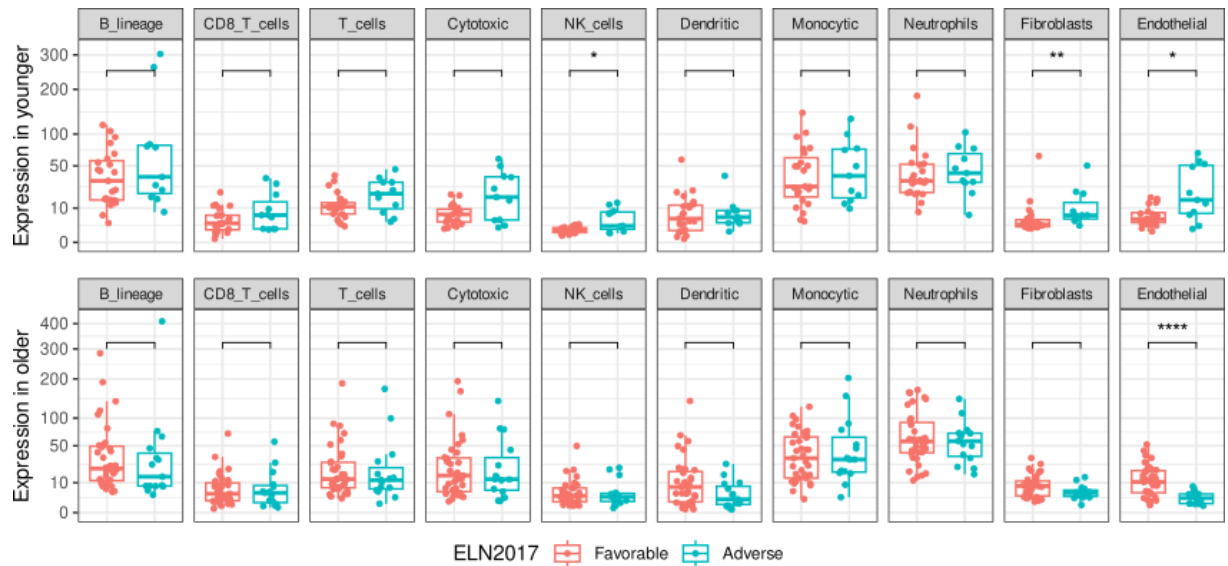

Figure AI3. Expression of immune and stromal cells in peripheral blood (PB) samples and comparison of favorable and adverse risk.

**Table S1. Metrics Method A**

| Younger - Beat-AML2.0 and Leucegene |          |      |             |             |      |
|-------------------------------------|----------|------|-------------|-------------|------|
| Model                               | Accuracy | AUC  | Sensitivity | Specificity | MCC  |
| DT                                  | 0.59     | 0.62 | 0.4         | 0.85        | 0.27 |
| KNN                                 | 0.83     | 0.8  | 0.97        | 0.63        | 0.66 |
| LR                                  | 0.92     | 0.92 | 0.92        | 0.91        | 0.83 |
| NN                                  | 0.85     | 0.82 | 0.97        | 0.67        | 0.69 |
| RF                                  | 0.83     | 0.8  | 0.95        | 0.65        | 0.65 |
| XGB                                 | 0.86     | 0.86 | 0.89        | 0.83        | 0.72 |
| Younger - Beat-AML2.0               |          |      |             |             |      |
| Model                               | Accuracy | AUC  | Sensitivity | Specificity | MCC  |
| DT                                  | 0.72     | 0.73 | 0.66        | 0.8         | 0.46 |
| KNN                                 | 0.83     | 0.82 | 1           | 0.64        | 0.7  |
| LR                                  | 0.94     | 0.94 | 1           | 0.88        | 0.89 |
| NN                                  | 0.85     | 0.84 | 1           | 0.68        | 0.73 |
| RF                                  | 0.83     | 0.82 | 0.97        | 0.68        | 0.68 |
| XGB                                 | 0.85     | 0.85 | 0.86        | 0.84        | 0.7  |
| Younger - Leucegene                 |          |      |             |             |      |
| Model                               | Accuracy | AUC  | Sensitivity | Specificity | MCC  |
| DT                                  | 0.46     | 0.55 | 0.19        | 0.9         | 0.13 |
| KNN                                 | 0.82     | 0.78 | 0.94        | 0.62        | 0.62 |
| LR                                  | 0.89     | 0.91 | 0.86        | 0.95        | 0.79 |
| NN                                  | 0.84     | 0.81 | 0.94        | 0.67        | 0.66 |
| RF                                  | 0.82     | 0.78 | 0.94        | 0.62        | 0.62 |
| XGB                                 | 0.88     | 0.86 | 0.92        | 0.81        | 0.73 |
| Older - Beat-AML2.0 and Leucegene   |          |      |             |             |      |
| Model                               | Accuracy | AUC  | Sensitivity | Specificity | MCC  |
| DT                                  | 0.73     | 0.71 | 0.65        | 0.78        | 0.43 |
| KNN                                 | 0.77     | 0.74 | 0.65        | 0.84        | 0.5  |
| LR                                  | 0.86     | 0.85 | 0.81        | 0.9         | 0.71 |
| NN                                  | 0.84     | 0.84 | 0.84        | 0.84        | 0.67 |
| RF                                  | 0.78     | 0.75 | 0.65        | 0.86        | 0.52 |
| XGB                                 | 0.91     | 0.92 | 0.94        | 0.9         | 0.82 |
| Older - Beat-AML2.0                 |          |      |             |             |      |
| Model                               | Accuracy | AUC  | Sensitivity | Specificity | MCC  |
| DT                                  | 0.72     | 0.73 | 0.66        | 0.8         | 0.46 |
| KNN                                 | 0.83     | 0.82 | 1           | 0.64        | 0.7  |
| LR                                  | 0.94     | 0.94 | 1           | 0.88        | 0.89 |
| NN                                  | 0.85     | 0.84 | 1           | 0.68        | 0.73 |
| RF                                  | 0.83     | 0.82 | 0.97        | 0.68        | 0.68 |
| XGB                                 | 0.85     | 0.85 | 0.86        | 0.84        | 0.7  |
| Older - Leucegene                   |          |      |             |             |      |
| Model                               | Accuracy | AUC  | Sensitivity | Specificity | MCC  |
| DT                                  | 0.61     | 0.62 | 0.42        | 0.82        | 0.25 |
| KNN                                 | 0.74     | 0.75 | 0.5         | 1           | 0.57 |
| LR                                  | 0.87     | 0.88 | 0.75        | 1           | 0.77 |
| NN                                  | 0.78     | 0.78 | 0.83        | 0.73        | 0.56 |
| RF                                  | 0.52     | 0.53 | 0.33        | 0.73        | 0.07 |
| XGB                                 | 0.87     | 0.86 | 1           | 0.73        | 0.76 |

**Table S2. Metrics Method B**

| Younger - Beat-AML2.0 and Leucegene |          |      |             |             |       |
|-------------------------------------|----------|------|-------------|-------------|-------|
| Model                               | Accuracy | AUC  | Sensitivity | Specificity | MCC   |
| DT                                  | 0.57     | 0.57 | 0.55        | 0.59        | 0.14  |
| KNN                                 | 0.84     | 0.82 | 0.94        | 0.7         | 0.67  |
| LR                                  | 0.88     | 0.87 | 0.92        | 0.83        | 0.76  |
| NN                                  | 0.86     | 0.84 | 0.92        | 0.76        | 0.7   |
| RF                                  | 0.88     | 0.87 | 0.95        | 0.78        | 0.76  |
| XGB                                 | 0.81     | 0.81 | 0.8         | 0.83        | 0.62  |
| Younger - Beat-AML2.0               |          |      |             |             |       |
| Model                               | Accuracy | AUC  | Sensitivity | Specificity | MCC   |
| DT                                  | 0.52     | 0.51 | 0.62        | 0.4         | 0.02  |
| KNN                                 | 0.85     | 0.84 | 0.97        | 0.72        | 0.72  |
| LR                                  | 0.87     | 0.87 | 0.93        | 0.8         | 0.74  |
| NN                                  | 0.81     | 0.8  | 0.97        | 0.64        | 0.65  |
| RF                                  | 0.87     | 0.86 | 1           | 0.72        | 0.76  |
| XGB                                 | 0.81     | 0.82 | 0.79        | 0.84        | 0.63  |
| Younger - Leucegene                 |          |      |             |             |       |
| Model                               | Accuracy | AUC  | Sensitivity | Specificity | MCC   |
| DT                                  | 0.61     | 0.65 | 0.5         | 0.81        | 0.31  |
| KNN                                 | 0.82     | 0.79 | 0.92        | 0.67        | 0.62  |
| LR                                  | 0.89     | 0.89 | 0.92        | 0.86        | 0.77  |
| NN                                  | 0.89     | 0.9  | 0.89        | 0.9         | 0.78  |
| RF                                  | 0.89     | 0.89 | 0.92        | 0.86        | 0.77  |
| XGB                                 | 0.81     | 0.81 | 0.81        | 0.81        | 0.6   |
| Older - Beat-AML2.0 and Leucegene   |          |      |             |             |       |
| Model                               | Accuracy | AUC  | Sensitivity | Specificity | MCC   |
| DT                                  | 0.72     | 0.7  | 0.61        | 0.78        | 0.4   |
| KNN                                 | 0.78     | 0.77 | 0.74        | 0.8         | 0.54  |
| LR                                  | 0.89     | 0.87 | 0.81        | 0.94        | 0.76  |
| NN                                  | 0.83     | 0.8  | 0.71        | 0.9         | 0.63  |
| RF                                  | 0.73     | 0.7  | 0.58        | 0.82        | 0.41  |
| XGB                                 | 0.84     | 0.83 | 0.77        | 0.88        | 0.66  |
| Older - Beat-AML2.0                 |          |      |             |             |       |
| Model                               | Accuracy | AUC  | Sensitivity | Specificity | MCC   |
| DT                                  | 0.83     | 0.83 | 0.84        | 0.82        | 0.64  |
| KNN                                 | 0.79     | 0.82 | 0.89        | 0.74        | 0.6   |
| LR                                  | 0.88     | 0.86 | 0.79        | 0.92        | 0.72  |
| NN                                  | 0.9      | 0.88 | 0.84        | 0.92        | 0.77  |
| RF                                  | 0.83     | 0.8  | 0.74        | 0.87        | 0.61  |
| XGB                                 | 0.91     | 0.9  | 0.84        | 0.95        | 0.8   |
| Older - Leucegene                   |          |      |             |             |       |
| Model                               | Accuracy | AUC  | Sensitivity | Specificity | MCC   |
| DT                                  | 0.43     | 0.44 | 0.25        | 0.64        | -0.12 |
| KNN                                 | 0.74     | 0.75 | 0.5         | 1           | 0.57  |
| LR                                  | 0.91     | 0.92 | 0.83        | 1           | 0.84  |
| NN                                  | 0.65     | 0.66 | 0.5         | 0.82        | 0.33  |
| RF                                  | 0.48     | 0.48 | 0.33        | 0.64        | -0.03 |
| XGB                                 | 0.65     | 0.65 | 0.67        | 0.64        | 0.3   |

**Table S3. Metrics Method C**

| Younger - Beat-AML2.0 and Leucegene |          |      |             |             |       |
|-------------------------------------|----------|------|-------------|-------------|-------|
| Model                               | Accuracy | AUC  | Sensitivity | Specificity | MCC   |
| DT                                  | 0.78     | 0.78 | 0.82        | 0.74        | 0.55  |
| KNN                                 | 0.69     | 0.65 | 0.91        | 0.39        | 0.36  |
| LR                                  | 0.77     | 0.75 | 0.89        | 0.61        | 0.53  |
| NN                                  | 0.71     | 0.66 | 0.98        | 0.33        | 0.44  |
| RF                                  | 0.84     | 0.81 | 0.97        | 0.65        | 0.68  |
| XGB                                 | 0.81     | 0.8  | 0.85        | 0.76        | 0.61  |
| Younger - Beat-AML2.0               |          |      |             |             |       |
| Model                               | Accuracy | AUC  | Sensitivity | Specificity | MCC   |
| DT                                  | 0.78     | 0.78 | 0.79        | 0.76        | 0.55  |
| KNN                                 | 0.69     | 0.68 | 0.79        | 0.56        | 0.36  |
| LR                                  | 0.78     | 0.77 | 0.86        | 0.68        | 0.55  |
| NN                                  | 0.7      | 0.68 | 0.97        | 0.4         | 0.45  |
| RF                                  | 0.87     | 0.86 | 1           | 0.72        | 0.76  |
| XGB                                 | 0.8      | 0.8  | 0.76        | 0.84        | 0.6   |
| Younger - Leucegene                 |          |      |             |             |       |
| Model                               | Accuracy | AUC  | Sensitivity | Specificity | MCC   |
| DT                                  | 0.79     | 0.77 | 0.83        | 0.71        | 0.55  |
| KNN                                 | 0.7      | 0.6  | 1           | 0.19        | 0.36  |
| LR                                  | 0.77     | 0.72 | 0.92        | 0.52        | 0.49  |
| NN                                  | 0.72     | 0.62 | 1           | 0.24        | 0.41  |
| RF                                  | 0.81     | 0.76 | 0.94        | 0.57        | 0.58  |
| XGB                                 | 0.82     | 0.79 | 0.92        | 0.67        | 0.62  |
| Older - Beat-AML2.0 and Leucegene   |          |      |             |             |       |
| Model                               | Accuracy | AUC  | Sensitivity | Specificity | MCC   |
| DT                                  | 0.67     | 0.6  | 0.32        | 0.88        | 0.25  |
| KNN                                 | 0.62     | 0.5  | 0           | 1           | 0     |
| LR                                  | 0.72     | 0.67 | 0.45        | 0.88        | 0.37  |
| NN                                  | 0.69     | 0.65 | 0.48        | 0.82        | 0.32  |
| RF                                  | 0.68     | 0.58 | 0.16        | 1           | 0.33  |
| XGB                                 | 0.65     | 0.55 | 0.1         | 1           | 0.25  |
| Older - Beat-AML2.0                 |          |      |             |             |       |
| Model                               | Accuracy | AUC  | Sensitivity | Specificity | MCC   |
| DT                                  | 0.74     | 0.67 | 0.47        | 0.87        | 0.38  |
| KNN                                 | 0.67     | 0.5  | 0           | 1           | 0     |
| LR                                  | 0.74     | 0.66 | 0.42        | 0.9         | 0.37  |
| NN                                  | 0.74     | 0.69 | 0.53        | 0.85        | 0.39  |
| RF                                  | 0.76     | 0.63 | 0.26        | 1           | 0.44  |
| XGB                                 | 0.72     | 0.58 | 0.16        | 1           | 0.33  |
| Older - Leucegene                   |          |      |             |             |       |
| Model                               | Accuracy | AUC  | Sensitivity | Specificity | MCC   |
| DT                                  | 0.48     | 0.5  | 0.08        | 0.91        | -0.01 |
| KNN                                 | 0.48     | 0.5  | 0           | 1           | 0     |
| LR                                  | 0.65     | 0.66 | 0.5         | 0.82        | 0.33  |
| NN                                  | 0.57     | 0.57 | 0.42        | 0.73        | 0.15  |
| RF                                  | 0.48     | 0.5  | 0           | 1           | 0     |
| XGB                                 | 0.48     | 0.5  | 0           | 1           | 0     |

**Table S4. Inversed models**

| <b>Younger kmers in older - Beat-AML2.0 and Leucegene</b> |                 |            |                    |                    |            |
|-----------------------------------------------------------|-----------------|------------|--------------------|--------------------|------------|
| <b>Model</b>                                              | <b>Accuracy</b> | <b>AUC</b> | <b>Sensitivity</b> | <b>Specificity</b> | <b>MCC</b> |
| DT                                                        | 0.58            | 0.54       | 0.35               | 0.72               | 0.08       |
| KNN                                                       | 0.78            | 0.78       | 0.77               | 0.78               | 0.54       |
| LR                                                        | 0.8             | 0.79       | 0.74               | 0.84               | 0.58       |
| NN                                                        | 0.74            | 0.73       | 0.71               | 0.76               | 0.46       |
| RF                                                        | 0.81            | 0.83       | 0.87               | 0.78               | 0.63       |
| XGB                                                       | 0.79            | 0.76       | 0.65               | 0.88               | 0.55       |
| <b>Older kmers in younger - Beat-AML2.0 and Leucegene</b> |                 |            |                    |                    |            |
| <b>Model</b>                                              | <b>Accuracy</b> | <b>AUC</b> | <b>Sensitivity</b> | <b>Specificity</b> | <b>MCC</b> |
| DT                                                        | 0.49            | 0.51       | 0.38               | 0.63               | 0.02       |
| KNN                                                       | 0.65            | 0.67       | 0.55               | 0.78               | 0.34       |
| LR                                                        | 0.7             | 0.71       | 0.66               | 0.76               | 0.42       |
| NN                                                        | 0.65            | 0.66       | 0.62               | 0.7                | 0.31       |
| RF                                                        | 0.41            | 0.45       | 0.23               | 0.67               | -0.11      |
| XGB                                                       | 0.63            | 0.67       | 0.46               | 0.87               | 0.35       |

**Table S5. Genes identified for younger patients**

| <b>Gene</b> | <b>Selected k-mers</b> |
|-------------|------------------------|
| ABR         | 15                     |
| ACVR2B      | 12                     |
| AMOT        | 13                     |
| ANKS6       | 434                    |
| ATP1A3      | 14                     |
| B4GAT1-DT   | 25                     |
| BAIAP2L2    | 14                     |
| BCAS4       | 28                     |
| BMI1        | 21                     |
| BMP8B       | 58                     |
| CD44        | 30                     |
| CD96        | 47                     |
| CEP192      | 18                     |
| CEP72       | 13                     |
| CLCN5       | 85                     |
| CLDND2      | 12                     |
| CLEC11A     | 61                     |
| CLEC4OP     | 24                     |
| CLEC9A      | 18                     |
| COL8A2      | 20                     |
| COMMD3-BMI1 | 23                     |
| CPNE8       | 12                     |
| CRACR2A     | 11                     |
| CROCC2      | 22                     |
| CRTC3       | 20                     |
| CYP2U1      | 12                     |
| CYP2U1-AS1  | 12                     |
| DGKH        | 38                     |
| DNMT3B      | 12                     |
| EHMT1       | 13                     |
| EPN1        | 17                     |
| F2R         | 12                     |
| FAM86B3P    | 28                     |
| FARP2       | 31                     |
| FBN1        | 20                     |
| GAPDH       | 11                     |
| GLCCI1      | 27                     |
| GPR84-AS1   | 50                     |
| HIVEP3      | 12                     |
| IGKV2-23    | 11                     |
| IGKV2-24    | 12                     |
| INPP5B      | 21                     |
| KHDC1       | 13                     |
| KIAA1549    | 37                     |
| KLRG1       | 12                     |
| LAMA5       | 275                    |
| LINC02811   | 12                     |
| LINC02891   | 32                     |
| LINGO3      | 14                     |
| LPO         | 261                    |



|             |      |
|-------------|------|
| MALAT1      | 12   |
| MAMDC2      | 14   |
| MAMDC2-AS1  | 12   |
| MGST1       | 31   |
| MPO         | 5502 |
| MRPL42      | 17   |
| NEIL1       | 39   |
| PAQR6       | 13   |
| PFKM        | 18   |
| PI4KA       | 12   |
| PIF1        | 12   |
| PLXNA1      | 54   |
| PPIE        | 58   |
| PPP1R9B     | 11   |
| QRFP        | 35   |
| RACK1       | 13   |
| RBFOX2      | 91   |
| RPS6KA1     | 12   |
| SAMD11      | 39   |
| SCAMP5      | 14   |
| SH3PXD2B    | 42   |
| SLC16A1-AS1 | 52   |
| SLC25A23    | 52   |
| SLC29A2     | 25   |
| SNORD116-4  | 15   |
| SPATS2L     | 11   |
| STK25       | 21   |
| STXBP5      | 29   |
| TALAM1      | 12   |
| TBC1D29P    | 44   |
| TBCD        | 13   |
| TIAM1       | 48   |
| TMEM213     | 22   |
| TMEM273     | 37   |
| TPM1        | 35   |
| TPPP        | 13   |
| TRIP10      | 19   |
| TRO         | 16   |
| TSPAN14-AS1 | 35   |
| TUBG2       | 16   |
| TXNIP       | 85   |
| UICLM       | 22   |
| VSTM1       | 17   |
| XKR6        | 14   |
| XYLB        | 14   |
| ZG16B       | 71   |
| ZHX3        | 30   |
| ZNF263      | 12   |
| ZNF532      | 91   |

**Table S6. Genes identified for older patients**

| <b>Gene</b>    | <b>Selected k-mers</b> |
|----------------|------------------------|
| AAK1           | 13                     |
| ABCB1          | 55                     |
| ABCG1          | 71                     |
| ABLIM1         | 20                     |
| ADCY3          | 28                     |
| AGBL2          | 17                     |
| AMPD3          | 22                     |
| ANPEP          | 12                     |
| APOL3          | 53                     |
| ARAP2          | 28                     |
| ARHGEF10       | 11                     |
| ARHGEF17       | 12                     |
| ARMCX5-GPRASP2 | 14                     |
| ATP10A         | 218                    |
| ATP8B3         | 35                     |
| ATP8B4         | 23                     |
| BAALC          | 190                    |
| BAALC-AS1      | 198                    |
| BAALC-AS2      | 78                     |
| BACH1-IT1      | 12                     |
| BCL2L14        | 23                     |
| BIN1           | 36                     |
| BMAL1          | 16                     |
| BRF1           | 23                     |
| C16orf46       | 35                     |
| C16orf74       | 17                     |
| C2orf88        | 67                     |
| C8orf88        | 22                     |
| CA5B           | 56                     |
| CAB39L         | 18                     |
| CALN1          | 20                     |
| CASK           | 11                     |
| CAT            | 148                    |
| CATSPER2       | 16                     |
| CCDC136        | 15                     |
| CCDC24         | 32                     |
| CD34           | 115                    |
| CD74           | 11                     |
| CDC42BPA       | 62                     |
| CELSR1         | 36                     |
| CIITA          | 40                     |
| CNGB3          | 33                     |
| COBLL1         | 48                     |
| COL24A1        | 53                     |

|           |     |
|-----------|-----|
| COL6A2    | 61  |
| CRELD2    | 18  |
| CRHBP     | 40  |
| CRNDE     | 140 |
| CRYBG3    | 11  |
| CTTN      | 20  |
| CUL4A     | 12  |
| CYFIP2    | 17  |
| DAZAP2    | 14  |
| DGAT1     | 11  |
| DGKE      | 11  |
| DIPK1B    | 19  |
| DLGAP3    | 29  |
| DMXL2     | 206 |
| DTWD2     | 31  |
| DUSP1     | 17  |
| EFNB1     | 11  |
| EGFL7     | 44  |
| EIF1B-AS1 | 14  |
| ELOVL7    | 33  |
| EPHA1-AS1 | 20  |
| ERG       | 13  |
| ESAM      | 24  |
| F2RL1     | 186 |
| FAM124B   | 24  |
| FAM30A    | 14  |
| FANK1     | 12  |
| FBLN5     | 13  |
| FBXO22    | 16  |
| FGFBP2    | 22  |
| FILNC1    | 11  |
| FIS1      | 12  |
| FLJ12825  | 13  |
| FOXO1     | 17  |
| GATA3     | 35  |
| GBP4      | 18  |
| GBP5      | 15  |
| GGTA1     | 12  |
| GNAI1     | 29  |
| GNG11     | 15  |
| GNL3      | 11  |
| GPR34     | 11  |
| GPRASP1   | 14  |
| GPRC5B    | 34  |
| GRAP2     | 13  |

|             |     |
|-------------|-----|
| GYPC        | 302 |
| H1-0        | 14  |
| H2BC4       | 11  |
| HAL         | 19  |
| HIBCH       | 67  |
| HILPDA-AS1  | 36  |
| HLA-B       | 20  |
| HLA-DPA1    | 28  |
| HLA-DPB1    | 33  |
| HLA-DRA     | 27  |
| HOMER3      | 14  |
| HPGD        | 14  |
| HSD17B4     | 23  |
| IFI16       | 37  |
| IFI44       | 77  |
| IFT140      | 11  |
| IGF2BP3     | 15  |
| IL12RB2     | 52  |
| IL6ST       | 19  |
| INHBA       | 17  |
| IPO9-AS1    | 162 |
| IQCG        | 54  |
| IQCK        | 64  |
| IQSEC2      | 11  |
| ISG20       | 49  |
| JUN         | 20  |
| KANK1       | 17  |
| KBTBD11-OT1 | 11  |
| KCNA3       | 20  |
| KIAA2026    | 13  |
| LAPTM5      | 43  |
| LDOC1       | 76  |
| LGMN        | 62  |
| LINC00174   | 14  |
| LINC00467   | 11  |
| LINC01237   | 12  |
| LINC02147   | 26  |
| LINC02573   | 15  |
| LINC02767   | 35  |
| LMLN        | 72  |
| LRP6        | 30  |
| LTB         | 14  |
| MAN1A1      | 50  |
| MAP6D1      | 16  |
| MCOLN2      | 14  |

|            |     |
|------------|-----|
| MEF2C-AS2  | 11  |
| MIAT       | 71  |
| MIR130AHG  | 20  |
| MITF       | 20  |
| MLANA      | 13  |
| MLYCD      | 12  |
| MMP19      | 144 |
| MMP28      | 28  |
| MN1        | 510 |
| MON1A      | 14  |
| MREG       | 63  |
| MRPL33     | 19  |
| MTAP       | 64  |
| MX1        | 80  |
| MYRIP      | 14  |
| NAV1       | 163 |
| NECAB1     | 17  |
| NEDD4L     | 78  |
| NEK11      | 12  |
| NHSL1      | 39  |
| NOXRED1    | 16  |
| NPR3       | 88  |
| NREP       | 21  |
| NRG4       | 24  |
| OCEL1      | 11  |
| OIP5       | 25  |
| OIP5-AS1   | 26  |
| OTULINL    | 23  |
| PAK1       | 38  |
| PAWR       | 74  |
| PBX3       | 53  |
| PEAR1      | 30  |
| PHKA2-AS1  | 11  |
| PIWIL4     | 95  |
| PIWIL4-AS1 | 95  |
| PPHLN1     | 22  |
| PPP1R26    | 11  |
| PREP       | 20  |
| PREPL      | 17  |
| PRICKLE1   | 49  |
| PRKCH      | 132 |
| PROM1      | 100 |
| PRR5       | 24  |
| PRR5L      | 55  |
| PSMB8      | 15  |

|            |     |
|------------|-----|
| PSMB9      | 37  |
| PTGFRN     | 50  |
| PXDC1      | 16  |
| QPRT       | 13  |
| RAB8A      | 34  |
| RABGAP1L   | 17  |
| RAMP1      | 18  |
| RBKS       | 18  |
| RBPMS-AS1  | 13  |
| RDX        | 197 |
| RFX8       | 20  |
| RIPOR3     | 187 |
| RNF130     | 21  |
| RNF217     | 111 |
| ROBO4      | 117 |
| RORA       | 20  |
| RORA-AS1   | 20  |
| RTN1       | 12  |
| SAMD15     | 11  |
| SCARF1     | 70  |
| SCD        | 27  |
| SCN1B      | 14  |
| SCRN1      | 93  |
| SERPINB6   | 125 |
| SHANK3     | 510 |
| SIAE       | 17  |
| SLC2A9     | 29  |
| SLC37A3    | 86  |
| SLC39A11   | 13  |
| SLC39A8    | 14  |
| SLC41A3    | 31  |
| SLC6A9     | 32  |
| SMAGP      | 14  |
| SNX33      | 11  |
| SPAG16     | 65  |
| SPRY1      | 12  |
| ST3GAL3    | 54  |
| STARD4-AS1 | 17  |
| STOM       | 71  |
| SUSD3      | 30  |
| SV2A       | 32  |
| SYN3       | 73  |
| SYNE2      | 15  |
| TAL1       | 38  |
| TAP1       | 37  |

|              |     |
|--------------|-----|
| TBCK         | 15  |
| TBXAS1       | 17  |
| TC2N         | 24  |
| TGFBR3       | 20  |
| TICAM2-AS1   | 30  |
| TIMP3        | 73  |
| TMC4         | 23  |
| TMC6         | 16  |
| TMC8         | 12  |
| TMED7-TICAM2 | 30  |
| TMEM204      | 11  |
| TP53I11      | 37  |
| TRH          | 41  |
| TRPS1        | 264 |
| TSPAN18      | 37  |
| TSPAN7       | 30  |
| USP54        | 15  |
| VSIG2        | 12  |
| YEATS2       | 23  |
| YEATS2-AS1   | 23  |
| YPEL4        | 20  |
| ZBP1         | 79  |
| ZC3H12C      | 195 |
| ZNF277-AS1   | 14  |
| ZNF626       | 13  |
| ZNF662       | 185 |

**Table S7. Summary of Cox model in younger patients**

Call:  
coxph(formula = formule\_y, data = training\_y)

n= 131, number of events= 46

|           | coef     | exp(coef) | se(coef) | z      | Pr(> z ) |     |
|-----------|----------|-----------|----------|--------|----------|-----|
| age       | 0.02954  | 1.02999   | 0.01367  | 2.161  | 0.03072  | *   |
| MP01      | -0.94206 | 0.38983   | 0.65894  | -1.430 | 0.15282  |     |
| CLCN51    | 0.34664  | 1.41431   | 0.38033  | 0.911  | 0.36207  |     |
| TPM11     | 0.44778  | 1.56484   | 0.36518  | 1.226  | 0.22013  |     |
| CLEC40P1  | -0.72477 | 0.48444   | 1.14734  | -0.632 | 0.52759  |     |
| TIAM11    | -0.02798 | 0.97240   | 0.41319  | -0.068 | 0.94600  |     |
| GLCCI11   | 1.20000  | 3.32011   | 0.42733  | 2.808  | 0.00498  | **  |
| SLC29A21  | 1.49507  | 4.45964   | 0.39911  | 3.746  | 0.00018  | *** |
| RACK11    | -0.92005 | 0.39850   | 0.44670  | -2.060 | 0.03943  | *   |
| NEIL11    | -0.12939 | 0.87863   | 0.41653  | -0.311 | 0.75608  |     |
| LING031   | 0.76455  | 2.14803   | 0.37248  | 2.053  | 0.04011  | *   |
| IGKV2_241 | -0.46193 | 0.63007   | 0.53574  | -0.862 | 0.38856  |     |
| BMI11     | 0.38799  | 1.47401   | 0.34729  | 1.117  | 0.26391  |     |

---  
Signif. codes: 0 '\*\*\*' 0.001 '\*\*' 0.01 '\*' 0.05 '.' 0.1 ' ' 1

|           | exp(coef) | exp(-coef) | lower .95 | upper .95 |
|-----------|-----------|------------|-----------|-----------|
| age       | 1.0300    | 0.9709     | 1.00275   | 1.0580    |
| MP01      | 0.3898    | 2.5652     | 0.10715   | 1.4183    |
| CLCN51    | 1.4143    | 0.7071     | 0.67113   | 2.9805    |
| TPM11     | 1.5648    | 0.6390     | 0.76494   | 3.2012    |
| CLEC40P1  | 0.4844    | 2.0643     | 0.05112   | 4.5905    |
| TIAM11    | 0.9724    | 1.0284     | 0.43266   | 2.1855    |
| GLCCI11   | 3.3201    | 0.3012     | 1.43685   | 7.6718    |
| SLC29A21  | 4.4596    | 0.2242     | 2.03974   | 9.7505    |
| RACK11    | 0.3985    | 2.5094     | 0.16603   | 0.9564    |
| NEIL11    | 0.8786    | 1.1381     | 0.38838   | 1.9877    |
| LING031   | 2.1480    | 0.4655     | 1.03511   | 4.4575    |
| IGKV2_241 | 0.6301    | 1.5871     | 0.22048   | 1.8006    |
| BMI11     | 1.4740    | 0.6784     | 0.74626   | 2.9115    |

Concordance= 0.848 (se = 0.03 )  
Likelihood ratio test= 78.96 on 13 df, p=2e-11  
Wald test = 53.81 on 13 df, p=7e-07  
Score (logrank) test = 78.68 on 13 df, p=2e-11



**Table S8. Schoenfeld residuals for Cox model in younger patients**

|          | chisq    | df | p     |
|----------|----------|----|-------|
| age      | 0.04959  | 1  | 0.824 |
| MPO      | 2.90832  | 1  | 0.088 |
| CLCN5    | 0.64535  | 1  | 0.422 |
| TPM1     | 0.59275  | 1  | 0.441 |
| CLEC40P  | 1.67329  | 1  | 0.196 |
| TIAM1    | 0.77515  | 1  | 0.379 |
| GLCCI1   | 0.68569  | 1  | 0.408 |
| SLC29A2  | 0.00189  | 1  | 0.965 |
| RACK1    | 0.00289  | 1  | 0.957 |
| NEIL1    | 0.93715  | 1  | 0.333 |
| LING03   | 3.61748  | 1  | 0.057 |
| IGKV2_24 | 0.04301  | 1  | 0.836 |
| BMI1     | 0.55816  | 1  | 0.455 |
| GLOBAL   | 14.77814 | 13 | 0.321 |

**Table S9. Summary of Cox model in older patients**

```
Call:
coxph(formula = formule_o, data = training_o)

n= 147, number of events= 97

      coef exp(coef) se(coef)      z Pr(>|z|)
age 0.06466  1.06680  0.01411  4.583 4.58e-06 ***
---
Signif. codes:  0 '***' 0.001 '**' 0.01 '*' 0.05 '.' 0.1 ' ' 1

      exp(coef) exp(-coef) lower .95 upper .95
age      1.067      0.9374      1.038      1.097

Concordance= 0.629 (se = 0.033 )
Likelihood ratio test= 20.15 on 1 df,  p=7e-06
Wald test               = 21.01 on 1 df,  p=5e-06
Score (logrank) test = 21.75 on 1 df,  p=3e-06
```

**Table S10. Schoenfeld residuals for Cox model in older patients**

|        | chisq | df | p    |
|--------|-------|----|------|
| age    | 0.744 | 1  | 0.39 |
| GLOBAL | 0.744 | 1  | 0.39 |

**Table S11. Gene ontology analysis for younger group**

| source - term name                                 | term id    | adjusted p-value | genes                                                                                                                                                                                                                                                                                                                                                                                                                                                                                                                                                                                                                                                                                                                                                                                                                                                                   |
|----------------------------------------------------|------------|------------------|-------------------------------------------------------------------------------------------------------------------------------------------------------------------------------------------------------------------------------------------------------------------------------------------------------------------------------------------------------------------------------------------------------------------------------------------------------------------------------------------------------------------------------------------------------------------------------------------------------------------------------------------------------------------------------------------------------------------------------------------------------------------------------------------------------------------------------------------------------------------------|
| GO:MF enzyme regulator activity                    | GO:0030234 | < 0.01           | ABR,ACVR2B,BMI1,FARP2,GAPDH,PIF1,PPP1R9B,RACK1,RPS6KA1,SH3PXD2B,STXBP5,TBCD,TIAM1,TXNIP,ALDH1A1,ANXA1,ARHGEF1,CCNA1,CCNK,CD109,DMPK,DMWD,DOCK1,DOCK4,DOCK9,GAS6,KRTCAP2,PREX1,RASAL2,RASGRP1,SH2D3A,SH2D3C,SH3BP5,SOCS2,SORL1                                                                                                                                                                                                                                                                                                                                                                                                                                                                                                                                                                                                                                           |
| GO:MF guanyl-nucleotide exchange factor activity   | GO:0005085 | < 0.01           | ABR,FARP2,TIAM1,ARHGEF1,DOCK1,DOCK4,DOCK9,PREX1,RASGRP1,SH2D3A,SH2D3C,SH3BP5                                                                                                                                                                                                                                                                                                                                                                                                                                                                                                                                                                                                                                                                                                                                                                                            |
| GO:MF receptor tyrosine kinase binding             | GO:0030971 | 0.01             | RACK1,TIAM1,ARTN,CPNE3,DOCK4,GAS6,PLCG1                                                                                                                                                                                                                                                                                                                                                                                                                                                                                                                                                                                                                                                                                                                                                                                                                                 |
| GO:BP positive regulation of locomotion            | GO:0040017 | < 0.01           | AMOT,F2R,MALAT1,RACK1,TALAM1,TIAM1,AKT3,ANXA1,ARTN,AZU1,CALR,CARMIL1,CPNE3,DOCK1,DOCK4,GAS6,MYLK,PECAM1,PLCG1,PPM1F,PREX1,PTK2,RREB1,SRPX2,VTN                                                                                                                                                                                                                                                                                                                                                                                                                                                                                                                                                                                                                                                                                                                          |
| GO:BP response to stimulus                         | GO:0050896 | < 0.01           | ABR,ACVR2B,AMOT,ATP1A3,BMI1,BMP8B,CD44,CD96,CEP192,CLEC11A,CPNE8,CRACR2A,CRTC3,CYP2U1,DGKH,EHMT1,EPN1,F2R,FARP2,FBN1,GAPDH,IGKV2-24,INPP5B,KLRG1,LAMA5,LPO,MGST1,MPO,NEIL1,PI4KA,PIF1,PLXNA1,PPP1R9B,QRFP,RACK1,RBFOX2,RPS6KA1,SCAMP5,SLC25A23,STK25,TIAM1,TPM1,TRIP10,TXNIP,VSTM1,ABCB6,ADGRG1,ADGRL1,AKT3,ALDH1A1,ANXA1,AOC1,ARHGEF1,ARTN,ASH2L,AZU1,BACH1,C1R,C1RL,CACNA2D4,CALCRL,CALR,CCNK,CD109,CFD,CLIC2,CPNE3,DMPK,DNAAF4,DOCK1,DOCK4,DOCK9,DTX3,ECHDC3,ELF1,EVL,EXT2,GAS6,GRAMD1B,GSTA4,HLA-E,HTR1F,IFI44L,IFITM2,INPP4B,ITPKA,ITPR3,LAG3,LPAR4,LPIN2,LSP1,MAD2L2,MEF2C,MLLT3,MYLK,NCOA7,NDFIP1,NRIP1,OPTN,OXR1,PECAM1,PFKFB2,PLCG1,PLIN2,PLXNC1,PPM1F,PPP3CC,PREX1,PRKD3,PRXL2A,PTK2,PTP4A3,RAB39B,RASAL2,RASGRP1,RBPMS,RREB1,RUNX3,SARM1,SH2D3A,SH2D3C,SH3BP5,SLC24A5,SLC41A1,SLC44A2,SNRPN,SOCS2,SORBS3,SORL1,SREBF1,SYNE1,SYTL4,TJP2,TRPM2,TSPAN14,VIM,VTN |
| GO:BP metal ion transport                          | GO:0030001 | < 0.01           | ATP1A3,COMMD3-BMI1,CRACR2A,F2R,SLC25A23,ABCB6,CACNA2D4,CALCRL,CLIC2,DMPK,FHL1,GAS6,ITPR3,KLHL3,MYLK,NDFIP1,PLCG1,PPP3CC,SFXN1,SLC24A5,SLC38A1,SLC41A1,TMCO3,TMEM163,TRPM2,TSPAN13                                                                                                                                                                                                                                                                                                                                                                                                                                                                                                                                                                                                                                                                                       |
| GO:BP cell communication                           | GO:0007154 | 0.02             | ABR,ACVR2B,AMOT,ATP1A3,BMI1,BMP8B,CD44,CLEC11A,CRACR2A,CRTC3,DGKH,EPN1,F2R,FARP2,FBN1,GAPDH,INPP5B,KLRG1,LAMA5,PFKM,PI4KA,PLXNA1,PPP1R9B,QRFP,RACK1,RBFOX2,RPS6KA1,STK25,STXBP5,TIAM1,TRIP10,TXNIP,VSTM1,ADGRG1,ADGRL1,AKT3,ANXA1,AOC1,ARHGEF1,ARTN,AZU1,CALCRL,CALR,CCNK,CD109,CLIC2,CPNE3,DLG3,DMPK,DNAAF4,DOCK1,DOCK4,DOCK9,DTX3,ELF1,EVL,GAS6,HTR1F,IFITM2,INPP4B,ITPKA,ITPR3,LAG3,LPAR4,LSP1,MAD2L2,MEF2C,MLLT3,NDFIP1,OPTN,PECAM1,PFKFB2,PLCG1,PLIN2,PLXNC1,PPM1F,PPP3CC,PREX1,PRKD3,PTK2,PTP4A3,RAB39B,RASAL2,RASGRP1,RBPMS,SARM1,SH2D3A,SH2D3C,SH3BP5,SLC38A1,SLC44A2,SOCS2,SORBS3,SORL1,SREBF1,SYNE1,SYTL4,TRPM2,TSPAN14,VIM,VTN                                                                                                                                                                                                                               |
| GO:BP intracellular signaling cassette             | GO:0141124 | 0.03             | ABR,AMOT,CD44,CRACR2A,F2R,FARP2,GAPDH,PPP1R9B,RACK1,STK25,TIAM1,ADGRG1,ADGRL1,ARHGEF1,AZU1,CALR,CLIC2,DMPK,DOCK1,DOCK4,DOCK9,GAS6,LPAR4,MEF2C,NDFIP1,OPTN,PLCG1,PPP3CC,PREX1,PTK2,PTP4A3,RAB39B,RASGRP1,RBPMS,SH2D3A,SH2D3C,SLC44A2,SORBS3,TRPM2,VIM                                                                                                                                                                                                                                                                                                                                                                                                                                                                                                                                                                                                                    |
| GO:BP positive regulation of stress fiber assembly | GO:0051496 | 0.04             | AMOT,TPM1,CARMIL1,EVL,PPM1F,SORBS3                                                                                                                                                                                                                                                                                                                                                                                                                                                                                                                                                                                                                                                                                                                                                                                                                                      |
| GO:CC cell periphery                               | GO:0071944 | < 0.01           | ACVR2B,AMOT,ATP1A3,BAIAP2L2,CD44,CD96,CLCN5,CLDND2,COL8A2,CPNE8,CRACR2A,DGKH,EPN1,F2R,FBN1,GAPDH,IGKV2-24,INPP5B,KIAA1549,KLRG1,LAMA5,LINGO3,LPO,MGST1,MRPL42,PAQR6,PFKM,PI4KA,PLXNA1,PPP1R9B,RACK1,SCAMP5,SLC29A2,STXBP5,TBCD,TIAM1,TPM1,TRIP10,TRO,VSTM1,XKR6,ABCB6,ADAMTS10,ADGRG1,ADGRL1,ANXA1,AOC1,ARHGEF1,CACNA2D4,CALCRL,CALR,CARMIL1,CD109,CEACAM21,CLIC2,CPNE3,DLG3,DMPK,DNAAF4,DOCK1,DOCK4,FHL1,GRAMD1B,HLA-E,HTR1F,IFITM2,ITPR3,KMT2E,LAG3,LPAR4,LRATD2,LSP1,MICALL2,MYLK,NDFIP1,PALS2,PECAM1,PLCG1,PLIN2,PLXNC1,PREX1,PRKD                                                                                                                                                                                                                                                                                                                                  |

|  |  |  |                                                                                                                                                                 |
|--|--|--|-----------------------------------------------------------------------------------------------------------------------------------------------------------------|
|  |  |  | 3,PTK2,PTP4A3,RAB11FIP4,RAB39B,RASGRP1,SH2D3C,SIDT1,SLC38A1,SLC41A1,SLC44A2,SORL1,SRPX2,SYNE1,SYTL4,TJP2,TMEM163,TMEM163A,TRPM2,TSPAN13,TSPAN14,VIM,VTN,ZNF804A |
|--|--|--|-----------------------------------------------------------------------------------------------------------------------------------------------------------------|

**Table S12. Gene ontology analysis for older group**

| source - term name                                           | term id    | adjusted p-value | genes                                                                                                                                                                                                                                                                                                                                                                                                                                                                                                                                                                                                                                                                                                                                                                                                                                                                  |
|--------------------------------------------------------------|------------|------------------|------------------------------------------------------------------------------------------------------------------------------------------------------------------------------------------------------------------------------------------------------------------------------------------------------------------------------------------------------------------------------------------------------------------------------------------------------------------------------------------------------------------------------------------------------------------------------------------------------------------------------------------------------------------------------------------------------------------------------------------------------------------------------------------------------------------------------------------------------------------------|
| GO:MF peptide antigen binding                                | GO:0042605 | 0.04             | HLA-B,HLA-DPA1,HLA-DPB1,HLA-DRA,TAP1,HLA-E                                                                                                                                                                                                                                                                                                                                                                                                                                                                                                                                                                                                                                                                                                                                                                                                                             |
| GO:BP cell adhesion                                          | GO:0007155 | <0.01            | CASK,CD34,CD74,CELSR1,COL6A2,CTTN,CYFIP2,DUSP1,EFNB1,EGFL7,ESAM,FBLN5,GATA3,HLA-DPA1,HLA-DPB1,HLA-DRA,IL6ST,KANK1,LAPTM5,LMLN,LRP6,PAWR,PEAR1,PRICKLE1,RDX,ROBO4,SCARF1,SCN1B,SLC39A8,ADGRG1,ADGRL1,ANXA1,AZU1,CALR,CARMIL1,DLG3,DOCK1,GAS6,HLA-E,LAG3,MAD2L2,MICALL2,NDFIP1,PECAM1,PLXNC1,PPM1F,PTK2,RASGRP1,RREB1,RUNX3,SORBS3,SRPX2,TJP2,VTN                                                                                                                                                                                                                                                                                                                                                                                                                                                                                                                        |
| GO:BP antigen processing and presentation of peptide antigen | GO:0048002 | <0.01            | CD74,HLA-B,HLA-DPA1,HLA-DPB1,HLA-DRA,LGMN,TAP1,CALR,HLA-E                                                                                                                                                                                                                                                                                                                                                                                                                                                                                                                                                                                                                                                                                                                                                                                                              |
| GO:BP regulation of protein metabolic process                | GO:0051246 | 0.02             | ABCG1,BIN1,BMAL1,C8ORF88,CD74,CUL4A,CYFIP2,DUSP1,FBXO22,FIS1,FOXO1,GNL3,GPRC5B,IFI16,IGF2BP3,IL6ST,INHBA,LAPTM5,LGMN,LRP6,NECAB1,NEDD4L,PAK1,PAWR,PIWIL4,PRICKLE1,PRR5,PRR5L,PSMB8,PSMB9,RAMP1,RDX,RNF217,RTN1,SERPINB6,SLC6A9,SNX33,TIMP3,YEATS2,AZU1,CALR,CCNK,CD109,DLG3,DNAAF4,GAS6,MAD2L2,NCOA7,NDFIP1,NECAB3,OXR1,PECAM1,PPM1F,PTK2,RASAL2,RASGRP1,SH2D3A,SH2D3C,SORL1,VIM,VTN                                                                                                                                                                                                                                                                                                                                                                                                                                                                                   |
| GO:BP organonitrogen compound metabolic process              | GO:1901564 | 0.03             | AAK1,ABCG1,ADCY3,AGBL2,AMPD3,ANPEP,APOL3,BIN1,BMAL1,C8ORF88,CASK,CAT,CD74,CDC42BPA,CUL4A,CYFIP2,DGAT1,DUSP1,ELOVL7,ERG,FBXO22,FIS1,FOXO1,GATA3,GGTA1,GNL3,GPRC5B,HAL,HIBCH,HSD17B4,IFI16,IGF2BP3,IL6ST,INHBA,LAPTM5,LGMN,LMLN,LRP6,MAN1A1,MYL9,MMP19,MMP28,MRPL33,MTAP,NECAB1,NEDD4L,NEK11,NOXRED1,PAK1,PAWR,PIWIL4,PREP,PREPL,PRICKLE1,PRKCH,PRR5,PRR5L,PSMB8,PSMB9,QPRT,RAMP1,RBKS,RDX,RNF130,RNF217,RORA,RTN1,SCRN1,SERPINB6,SLC2A9,SLC39A8,SLC6A9,SNX33,ST3GAL3,TBCK,TIMP3,TRH,USP54,YEATS2,ABCB6,ADAMTS10,AKT3,ALDH1A1,ANXA1,AOC1,AZU1,C1R,C1RL,CALR,CARMIL1,CCNK,CD109,CFD,DLG3,DMPK,DNAAF4,DTX3,EXT2,FBXO44,GALNT12,GAS6,GSTA4,KLHL3,KRTCAP2,MAD2L2,MBOAT2,MYLK,NCOA7,NDFIP1,NECAB3,OSBPL5,OXR1,PECAM1,PFKFB2,PPM1F,PPP3CC,PRKD3,PTK2,PTP4A3,RASAL2,RASGRP1,RUNX3,SARM1,SH2D3A,SH2D3C,SLC38A1,SLC44A2,SOCS2,SORL1,ST6GALNAC4,ST8SIA4,TJP2,TSPAN14,USP30,VIM,VTN |
| GO:BP cardiac fibroblast cell development                    | GO:0060936 | 0.04             | INHBA,SPRY1,TGFBR3                                                                                                                                                                                                                                                                                                                                                                                                                                                                                                                                                                                                                                                                                                                                                                                                                                                     |
| GO:BP regulation of cellular component organization          | GO:0051128 | 0.04             | AAK1,ARHGEF10,ATP10A,BIN1,CELSR1,CTTN,CYFIP2,DUSP1,EFNB1,ESAM,F2RL1,FIS1,GATA3,GBP5,GNAI1,GNL3,IFT140,INHBA,KANK1,MAP6D1,NEDD4L,PAK1,PPHLN1,PRKCH,PRR5,RDX,SCARF1,SCN1B,SHANK3,SNX33,SYNE2,TAL1,TGFBR3,TMC8,ADGRL1,ANXA1,AZU1,CALR,CARMIL1,DMPK,EVL,FHL1,GAS6,ITPKA,MAD2L2,MEF2C,MLLT3,PLXNC1,PPM1F,PPP3CC,PREX1,PTK2,RREB1,SARM1,SOCS2,SORBS3,SORL1,SREBF1,SRPX2,SYNE1,SYTL4,TRIM46,TRPM2,USP30,VIM,VTN,ZNF804A                                                                                                                                                                                                                                                                                                                                                                                                                                                       |
| GO:CC MHC protein complex                                    | GO:0042611 | <0.01            | CD74,HLA-B,HLA-DPA1,HLA-DPB1,HLA-DRA,HLA-E                                                                                                                                                                                                                                                                                                                                                                                                                                                                                                                                                                                                                                                                                                                                                                                                                             |
| GO:CC plasma membrane bounded cell projection                | GO:0120025 | <0.01            | AAK1,ABLIM1,ADCY3,AGBL2,BAALC,BIN1,CASK,CATSPER2,CDC42BPA,CNGB3,CRHBP,CTTN,CYFIP2,F2RL1,FANK1,HOMER3,IFT140,IL6ST,IQGK,KANK1,KCNA3,MYRIP,NAV1,PAK1,PEAR1,PROM1,RAB8A,RABGAP1L,RDX,ROBO4,RTN1,SCN1B,SHANK3,SPAG16,SV2A,SYNE2,ACAD9,ADGRG1,ADGRL1,ALDH1A1,ANXA1,CARMIL1,DLG3,DMWD,DNAAF4,DOCK4,EVL,HTR1F,ITPKA,MICALL2,MYLK,NDFIP1,PLCG1,PREX1,PTK2,RAB39B,SARM1,SH2D3C,SLC38A1,SYNE1,TRIM46,TSGA10,VIM,ZNF804A                                                                                                                                                                                                                                                                                                                                                                                                                                                          |
| GO:CC lysosomal membrane                                     | GO:0005765 | 0.02             | ANPEP,CD74,GNAI1,HLA-DPA1,HLA-DPB1,HLA-DRA,LAPTM5,MITF,MREG,SLC37A3,SLC39A8,STOM,ABCB6,AZU1,CPNE3,IFITM2,SLC44A2,TMEM163,TMEM63A,TRPM2                                                                                                                                                                                                                                                                                                                                                                                                                                                                                                                                                                                                                                                                                                                                 |
